# Supplementary material for: Upregulation of ETV2 Expression Promotes Endothelial Differentiation of Human Dental Pulp Stem Cells
Source: PubMed Central journal article supplement — Cell Transplant. 2021 Jan 31;30:0963689720978739. doi: 10.1177/0963689720978739 (PMC7863555; doi:10.1177/0963689720978739), 2021-01-31
Supplement: sj-pdf-1-cll-10.1177_0963689720978739.pdf [file sj-pdf-1-cll-10.1177_0963689720978739.pdf]

**Supplemental Figure 1.** GO enrichment analysis of proteins. The bar charts showed enriched GO terms related to upregulated or downregulated proteins categorized by BP or MF. The top 15 terms ranked in each situation were listed. DPSCs: dental pulp stem cells; GO: Gene Ontology.

**Supplemental Figure 2.** The results of KEGG signaling pathway analysis. The top 20 most enriched pathways related to upregulated (A) or downregulated (B) proteins were presented in the bubble charts. KEGG: Kyoto Encyclopedia of Genes and Genomes.

**Table S1.** Reactome pathway enrichment analysis related to downregulated proteins

| Category         | Term                                                             | Count | %           | PValue      | Fold Enrichment |
|------------------|------------------------------------------------------------------|-------|-------------|-------------|-----------------|
| REACTOME_PATHWAY | REACT_152:Cell Cycle, Mitotic                                    | 50    | 0.442086649 | 3.16643E-11 | 2.699911009     |
| REACTOME_PATHWAY | REACT_383:DNA Replication                                        | 21    | 0.185676393 | 7.71815E-07 | 3.553862244     |
| REACTOME_PATHWAY | REACT_1538:Cell Cycle Checkpoints                                | 21    | 0.185676393 | 8.17287E-06 | 3.077898551     |
| REACTOME_PATHWAY | REACT_6344:Tat-mediated HIV-1 elongation arrest and recovery     | 9     | 0.079575597 | 0.000292102 | 4.924637681     |
| REACTOME_PATHWAY | REACT_6143:Pausing and recovery of Tat-mediated HIV-1 elongation | 9     | 0.079575597 | 0.000292102 | 4.924637681     |
| REACTOME_PATHWAY | REACT_6244:Pausing and recovery of HIV-1 elongation              | 9     | 0.079575597 | 0.000373486 | 4.765778401     |
| REACTOME_PATHWAY | REACT_1892:Elongation arrest and recovery                        | 9     | 0.079575597 | 0.000373486 | 4.765778401     |

|                  |                                                                 |    |             |             |             |
|------------------|-----------------------------------------------------------------|----|-------------|-------------|-------------|
| REACTOME_PATHWAY | REACT_6259:HIV-1 elongation arrest and recovery                 | 9  | 0.079575597 | 0.000373486 | 4.765778401 |
| REACTOME_PATHWAY | REACT_769:Pausing and recovery of elongation                    | 9  | 0.079575597 | 0.000373486 | 4.765778401 |
| REACTOME_PATHWAY | REACT_17015:Metabolism of proteins                              | 26 | 0.229885057 | 0.001117419 | 1.966829181 |
| REACTOME_PATHWAY | REACT_6185:HIV Infection                                        | 23 | 0.203359859 | 0.001376344 | 2.051932367 |
| REACTOME_PATHWAY | REACT_7970:Telomere Maintenance                                 | 10 | 0.08841733  | 0.005806143 | 2.931331953 |
| REACTOME_PATHWAY | REACT_216:DNA Repair                                            | 14 | 0.123784262 | 0.007824269 | 2.253102207 |
| REACTOME_PATHWAY | REACT_71:Gene Expression                                        | 33 | 0.291777188 | 0.010129193 | 1.547743271 |
| REACTOME_PATHWAY | REACT_16888:Signaling by PDGF                                   | 10 | 0.08841733  | 0.013869064 | 2.564915459 |
| REACTOME_PATHWAY | REACT_6850:Cdc20:Phospho-APC/C mediated degradation of Cyclin A | 10 | 0.08841733  | 0.016788164 | 2.487190748 |
| REACTOME_PATHWAY | REACT_9417:Signaling by EGFR                                    | 8  | 0.070733864 | 0.021507186 | 2.79412067  |
| REACTOME_PATHWAY | REACT_1675:mRNA Processing                                      | 6  | 0.053050398 | 0.041169223 | 3.077898551 |
| REACTOME_PATHWAY | REACT_11045:Signaling by Wnt                                    | 8  | 0.070733864 | 0.073468516 | 2.152847074 |
| REACTOME_PATHWAY | REACT_498:Signaling by Insulin receptor                         | 6  | 0.053050398 | 0.083948122 | 2.525455221 |

|                  |                                     |    |             |             |             |
|------------------|-------------------------------------|----|-------------|-------------|-------------|
| REACTOME_PATHWAY | REACT_578:Apoptosis                 | 13 | 0.114942529 | 0.088584924 | 1.654271056 |
| REACTOME_PATHWAY | REACT_12472:Regulatory RNA pathways | 4  | 0.035366932 | 0.091472255 | 3.647879764 |
| REACTOME_PATHWAY | REACT_1788:Transcription            | 13 | 0.114942529 | 0.096741392 | 1.629015009 |

---
